# Supplementary material for: Growth deficiency in a mouse model of Kabuki syndrome 2 bears mechanistic similarities to Kabuki syndrome 1
Source: PubMed Central journal article supplement (PMC11192384; doi:10.1371/journal.pgen.1011310), 2024-06-10
Supplement: pgen.1011310.s001.pdf [file pgen.1011310.s001.pdf]

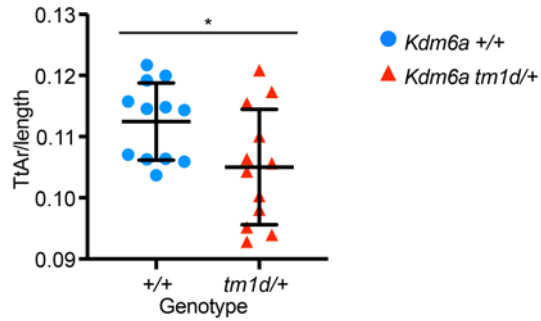

**S1 Fig. Tissue area of *Kdm6a*<sup>*tm1d/+*</sup> and *Kdm6a*<sup>*+/+*</sup> littermates, normalized by femur length.** *Kdm6a*<sup>*tm1d/+*</sup> mice have decreased tissue area compared to *Kdm6a*<sup>*+/+*</sup> even after adjustment for shorter femur lengths. *Kdm6a*<sup>*+/+*</sup> n=12; *Kdm6a*<sup>*tm1d/+*</sup> n=12. Blue circles: *Kdm6a*<sup>*+/+*</sup>, red triangles: *Kdm6a*<sup>*tm1d/+*</sup>. \*p < 0.05, two-tailed unpaired Student's t-test. All error bars represent mean ± 1 SD. TtAr, total area.
