# Supplementary material for: Growth deficiency in a mouse model of Kabuki syndrome 2 bears mechanistic similarities to Kabuki syndrome 1
Source: PubMed Central journal article supplement (PMC11192384; doi:10.1371/journal.pgen.1011310), 2024-06-10
Supplement: pgen.1011310.s002.pdf [file pgen.1011310.s002.pdf]

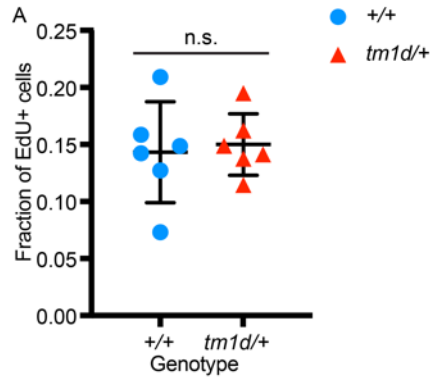

**S2 Fig. Cell proliferation rate does not differ between growth plates from  $Kdm6a^{tm1d/+}$  and  $Kdm6a^{+/+}$  mice.** Calculated fraction of EdU+ cells in the growth plates of  $Kdm6a^{tm1d/+}$  mice and  $Kdm6a^{+/+}$  littermate controls. Blue circles:  $Kdm6a^{+/+}$ , red triangles:  $Kdm6a^{tm1d/+}$ . n.s., non-significant, two-tailed unpaired Student's t-test. All error bars represent mean  $\pm$  1 SD.
