# Supplementary material for: Growth deficiency in a mouse model of Kabuki syndrome 2 bears mechanistic similarities to Kabuki syndrome 1
Source: PubMed Central journal article supplement (PMC11192384; doi:10.1371/journal.pgen.1011310), 2024-06-10
Supplement: pgen.1011310.s003.pdf [file pgen.1011310.s003.pdf]

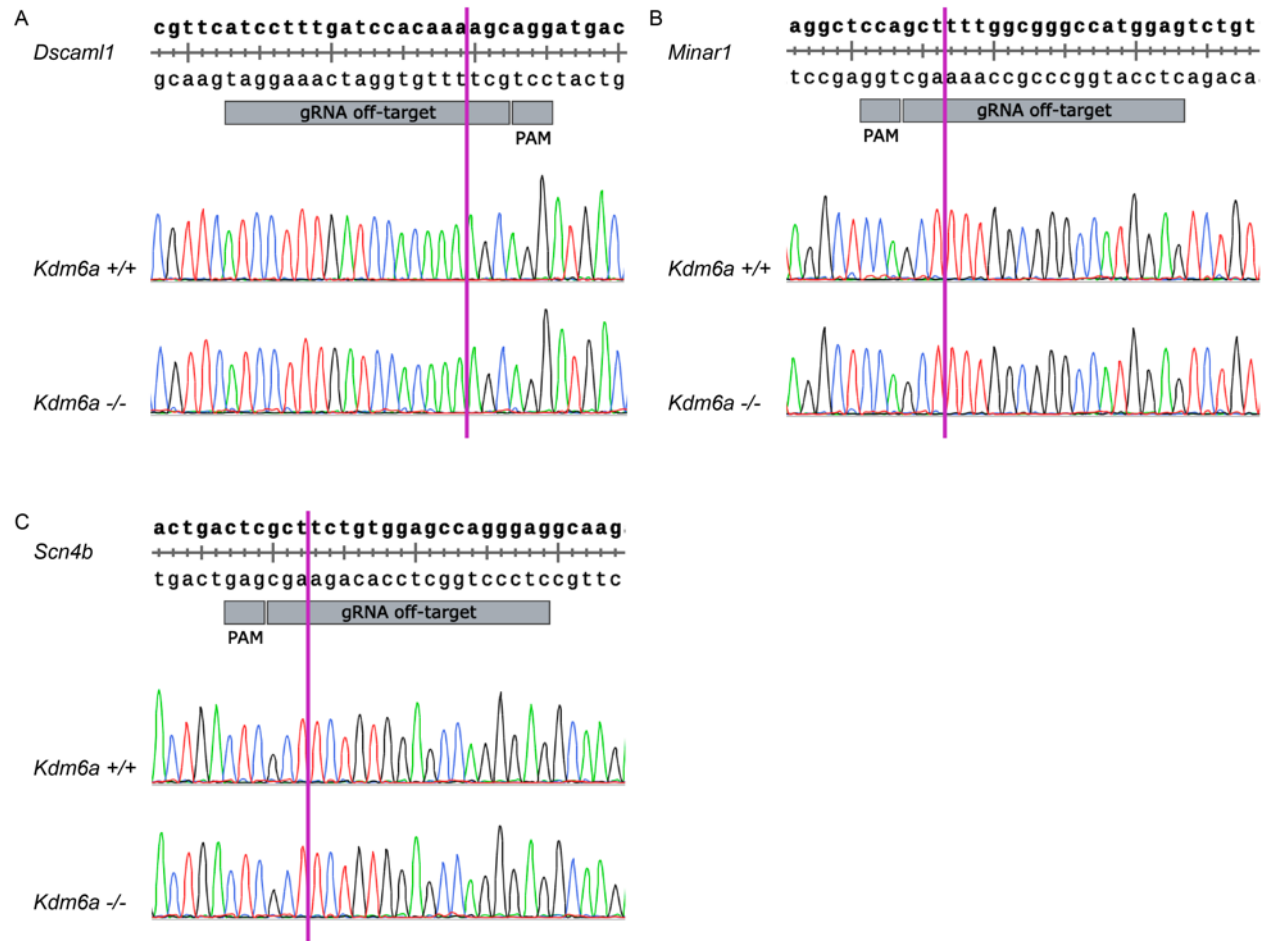

**S3 Fig. Absence of off-target editing in *Kdm6a*<sup>+/+</sup> and *Kdm6a*<sup>-/-</sup> cell lines at top predicted exonic sites.** Representative chromatogram traces from *Kdm6a*<sup>+/+</sup> and *Kdm6a*<sup>-/-</sup> lines are shown for: (A) *Dscaml1*, (B) *Minar1*, and (C) *Scn4b*. Purple line indicates predicted off-target Cas9 cleavage site.
