# Supplementary material for: Growth deficiency in a mouse model of Kabuki syndrome 2 bears mechanistic similarities to Kabuki syndrome 1
Source: PubMed Central journal article supplement (PMC11192384; doi:10.1371/journal.pgen.1011310), 2024-06-10
Supplement: pgen.1011310.s004.pdf [file pgen.1011310.s004.pdf]

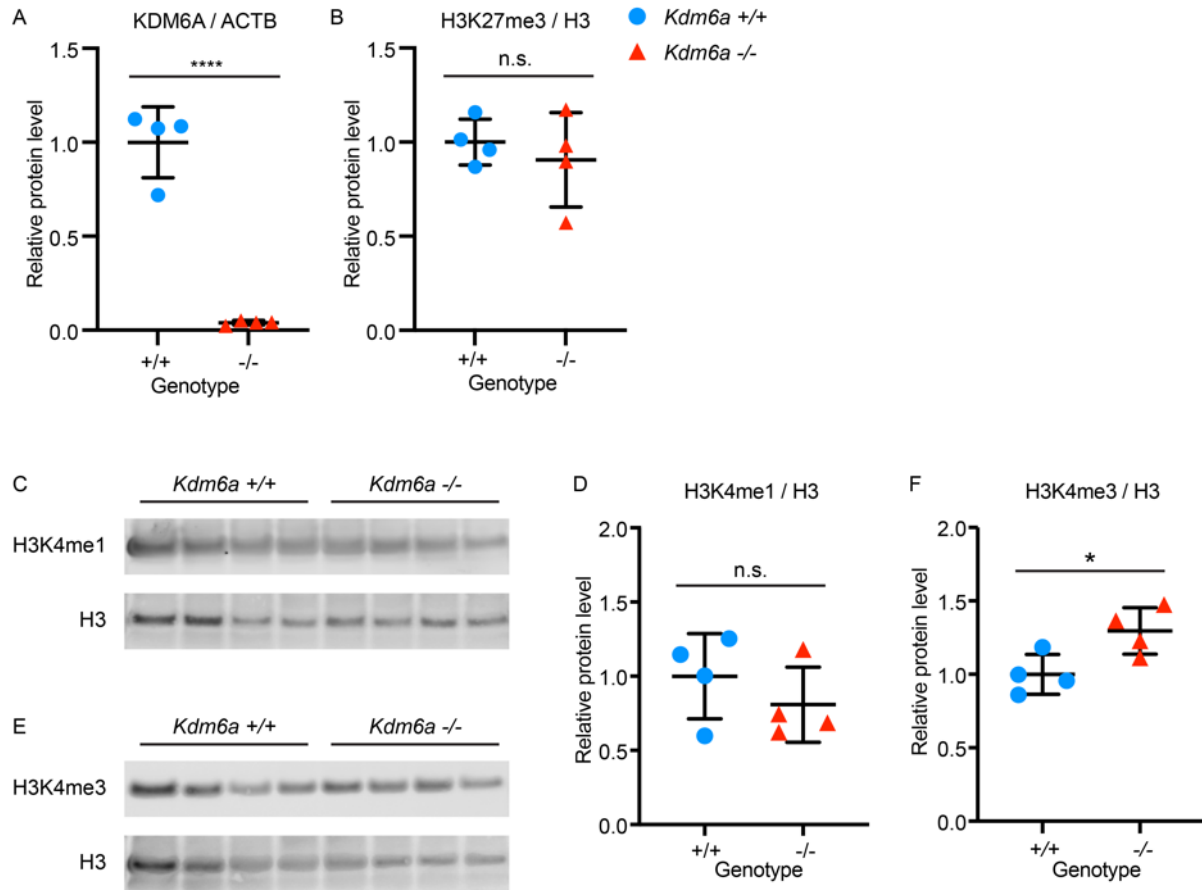

**S4 Fig. *Kdm6a*<sup>-/-</sup> cells do not express KDM6A and have increased global H3K4me3.** For all densitometry panels, a relative protein level of 1.0 corresponds to the mean densitometry of *Kdm6a*<sup>+/+</sup> cell lines. (A) *Kdm6a*<sup>-/-</sup> cells have negligible KDM6A expression, normalized against ACTB loading controls. (B) There is no significant difference in H3K27me3 levels between *Kdm6a*<sup>-/-</sup> and *Kdm6a*<sup>+/+</sup> cell lines, with H3 serving as loading control. (C) Western blot and (D) densitometry quantification show no difference in global H3K4me1 between *Kdm6a*<sup>-/-</sup> and *Kdm6a*<sup>+/+</sup> cell lines. H3K4me3 is significantly increased in *Kdm6a*<sup>-/-</sup> cells by (E) western blot and (F) densitometry quantification. Blue circles: *Kdm6a*<sup>+/+</sup>, red triangles: *Kdm6a*<sup>-/-</sup>. \**p* < 0.05, \*\*\*\**p* < 0.0001, two-tailed unpaired Student's t-test. n.s., non-significant. All error bars represent mean ± 1 SD.
