# Supplementary material for: Growth deficiency in a mouse model of Kabuki syndrome 2 bears mechanistic similarities to Kabuki syndrome 1
Source: PubMed Central journal article supplement (PMC11192384; doi:10.1371/journal.pgen.1011310), 2024-06-10
Supplement: pgen.1011310.s006.pdf [file pgen.1011310.s006.pdf]

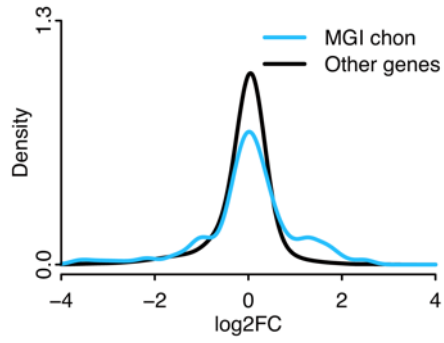

**S6 Fig. Density distribution of expression fold-changes comparing *Kdm6a*<sup>-/-</sup> to *Kdm6a*<sup>+/+</sup> chondrocytes.** A greater proportion of genes annotated by MGI as involved in cartilage development (blue line) exhibit higher absolute fold-changes than non-chondrogenic genes (black line). MGI chon, MGI-annotated chondrogenic genes.
