# Supplementary material for: Growth deficiency in a mouse model of Kabuki syndrome 2 bears mechanistic similarities to Kabuki syndrome 1
Source: PubMed Central journal article supplement (PMC11192384; doi:10.1371/journal.pgen.1011310), 2024-06-10
Supplement: pgen.1011310.s008.pdf [file pgen.1011310.s008.pdf]

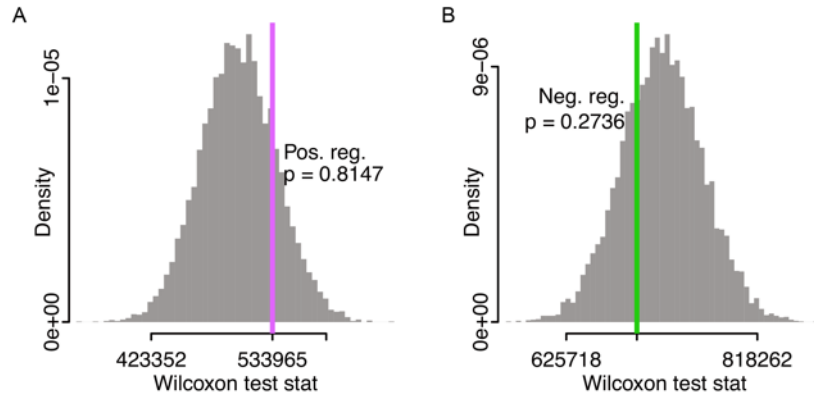

**S8 Fig. *Kdm6a*<sup>-/-</sup> cells do not exhibit collective dysregulation of cell size pathways.** Wilcoxon rank-sum test statistic for (A) MGI positive regulators of cell size (magenta line,  $p=0.8147$ ) and (B) MGI negative regulators of cell size (green line,  $p=0.2738$ ). The simulated distribution of test statistics is displayed for each (gray). Pos. reg., positive regulators; neg. reg., negative regulators.
