# Supplementary material for: Growth deficiency in a mouse model of Kabuki syndrome 2 bears mechanistic similarities to Kabuki syndrome 1
Source: PubMed Central journal article supplement (PMC11192384; doi:10.1371/journal.pgen.1011310), 2024-06-10
Supplement: pgen.1011310.s009.pdf [file pgen.1011310.s009.pdf]

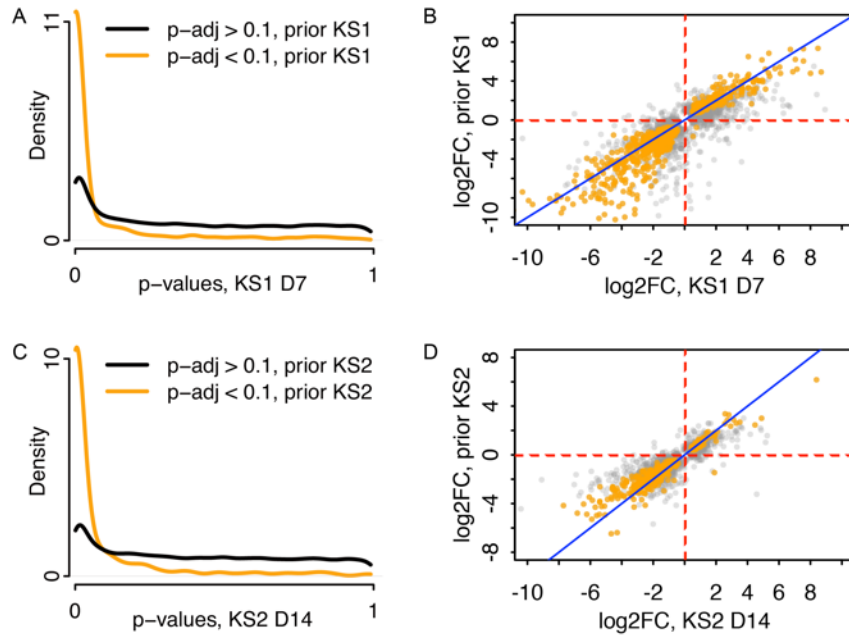

**S9 Fig. Validation of KS1 and KS2 RNA-seq data by comparison to prior datasets.** (A) Conditional p-value density plot displaying gene-wise p-values from the *Kmt2d*<sup>-/-</sup> versus *Kmt2d*<sup>+/+</sup> contrast at Day 7 of chondrogenic differentiation, stratified by significance in a prior dataset comparing *Kmt2d*<sup>-/-</sup> versus *Kmt2d*<sup>+/+</sup> cells, also collected at Day 7 (22). Orange: genes that were significant (FDR < 0.1) in the prior dataset; black: non-significant in prior dataset. (B) Scatter plot of gene-wise  $\log_2(\text{fold-changes})$  in present and prior datasets at Day 7 shows high concordance in fold-change directionalities between datasets. A similar analysis was performed for the *Kdm6a*<sup>-/-</sup> versus *Kdm6a*<sup>+/+</sup> contrast at Day 14: (C) conditional p-value histogram and (D)  $\log_2(\text{fold-change})$  scatter plot.
