# Supplementary material for: Growth deficiency in a mouse model of Kabuki syndrome 2 bears mechanistic similarities to Kabuki syndrome 1
Source: PubMed Central journal article supplement (PMC11192384; doi:10.1371/journal.pgen.1011310), 2024-06-10
Supplement: pgen.1011310.s010.pdf [file pgen.1011310.s010.pdf]

**S1 Table. ATDC5 cell line genotypes**

| Line  | Genotype     | Allele variants                                                                             |
|-------|--------------|---------------------------------------------------------------------------------------------|
| 10-37 | Compound het | NM_009483.2:c.496del p.(Cys166Valfs*16)<br>NM_009483.2:c.483_493del p.(Asp162Leufs*21)      |
| 10-39 | Compound het | NM_009483.2:c.495_496del p.(Phe165Leufs*21)<br>NM_009483.2:c.493_494insA p.(Phe165Tyrfs*22) |
| 96-15 | Compound het | NM_009483.2:c.495_496del p.(Phe165Leufs*21)<br>NM_009483.2:c.496del p.(Cys166Valfs*16)      |
| 96-20 | Compound het | NM_009483.2:c.496dup p.(Cys166Leufs*21)<br>NM_009483.2:c.496del p.(Cys166Valfs*16)          |
| 96-21 | Compound het | NM_009483.2:c.495_496del p.(Phe165Leufs*21)<br>NM_009483.2:c.496dup p.(Cys166Leufs*21)      |
| 10-3  | Wild-type    |                                                                                             |
| 10-29 | Wild-type    |                                                                                             |
| 96-13 | Wild-type    |                                                                                             |
| 96-14 | Wild-type    |                                                                                             |
| 96-19 | Wild-type    |                                                                                             |
