# Supplementary material for: Growth deficiency in a mouse model of Kabuki syndrome 2 bears mechanistic similarities to Kabuki syndrome 1
Source: PubMed Central journal article supplement (PMC11192384; doi:10.1371/journal.pgen.1011310), 2024-06-10
Supplement: pgen.1011310.s011.pdf [file pgen.1011310.s011.pdf]

**S2 Table. Reagents**

|                                             | <b>Species</b> | <b>Manufacturer</b>       | <b>Catalog no.</b> | <b>Dilution</b> |
|---------------------------------------------|----------------|---------------------------|--------------------|-----------------|
| anti-H3K27me3                               | Rabbit         | Millipore Sigma           | 07-449             | 1:1000 (WB)     |
| anti-H3K27me1                               | Rabbit         | Abcam                     | ab8895             | 1:500 (WB)      |
| anti-H3                                     | Rabbit         | Cell Signaling Technology | 4499               | 1:2000 (WB)     |
| anti-KDM6A                                  | Rabbit         | Cell Signaling Technology | 33510              | 1:1000 (WB)     |
| anti-KMT2D                                  | Rabbit         | Millipore Sigma           | ABE1867            | 1:500 (WB)      |
| anti-ACTB                                   | Mouse          | Cell Signaling Technology | 3700               | 1:1000 (WB)     |
| anti-Vinculin                               | Mouse          | Millipore Sigma           | V9131              | 1:10,000 (WB)   |
| IRDye 800CW Donkey<br>anti-Rabbit IgG       | Donkey         | LI-COR                    | 926-32213          | 1:10,000 (WB)   |
| IRDye 680RD Donkey<br>anti-Mouse IgG        | Donkey         | LI-COR                    | 926-68072          | 1:10,000 (WB)   |
| anti-COL10A1                                | Rabbit         | Novus Bio                 | NBP3-03757         | 1:100 (IF)      |
| anti-EDN1                                   | Rabbit         | Abcam                     | ab117757           | 1:2000 (IF)     |
| Alexa Fluor 555 –<br>Conjugated anti-Rabbit | Goat           | ThermoFisher Scientific   | A21429             | 1:400 (IF)      |
